# Supplementary material for: CD39 and immune regulation in a chronic helminth infection: The puzzling case of Mansonella ozzardi
Source: PubMed Central journal article supplement (PMC5854421; doi:10.1371/journal.pntd.0006327), 2018-03-05
Supplement: pntd.0006327.s008.pdf [file pntd.0006327.s008.pdf]

**S1 Table. Panel 1: monoclonal antibodies used to characterize regulatory and activation markers on CD4<sup>+</sup> T cells.**

| Specificity | Fluorochrome | Volume per test ( $\mu$ L) | Manufacturer |
|-------------|--------------|----------------------------|--------------|
| FoxP3       | PerCPcy5.5   | 5                          | e-Bioscience |
| CD39        | FITC         | 3                          | Biolegend    |
| CD4         | APCcy7       | 1                          | Biolegend    |
| CTLA-4      | APC          | 5                          | Biolegend    |
| HLA-DR      | Alexa 700    | 3                          | BD           |
| CD25        | BV 605       | 3                          | Biolegend    |
| PD-1        | BV 650       | 5                          | BD Horizon   |
| Viability   | Acqua        | 0.67                       | Invitrogen   |
| CD127       | BV 421       | 3                          | Biolegend    |
| CD3         | PE-TR        | 1                          | Invitrogen   |
| CD69        | PEcy7        | 3                          | Biolegend    |
| CD8         | PEcy5        | 20                         | BD           |
| TNFR11      | PE           | 7.5                        | BD           |
