# Supplementary material for: CD39 and immune regulation in a chronic helminth infection: The puzzling case of Mansonella ozzardi
Source: PubMed Central journal article supplement (PMC5854421; doi:10.1371/journal.pntd.0006327), 2018-03-05
Supplement: pntd.0006327.s009.pdf [file pntd.0006327.s009.pdf]

**S2 Table. Panel 2: Monoclonal antibodies used to characterize regulatory and activation markers on CD4<sup>+</sup> T cells.**

| Specificity      | Fluorochrome | Volume per test ( $\mu$ L) | Manufacturer |
|------------------|--------------|----------------------------|--------------|
| FoxP3            | Perpcy5.5    | 5                          | e-Bioscience |
| CD39             | FITC         | 3                          | Biolegend    |
| CD4              | APCcy7       | 1                          | Biolegend    |
| CTLA-4           | APC          | 5                          | Biolegend    |
| CD25             | BV 605       | 3                          | Biolegend    |
| OX40             | BV 650       | 5                          | BD horizon   |
| Viability        | Acqua        | 0.67                       | Invitrogen   |
| CD127            | BV 421       | 3                          | Biolegend    |
| CD3              | PE-TR        | 1                          | Invitrogen   |
| LAG3             | PEcy7        | 3                          | eBiosciences |
| GITR             | PEcy5        | 5                          | Biolegend    |
| LAP-TGF- $\beta$ | PE           | 3                          | Biolegend    |
