# Supplementary material for: CD39 and immune regulation in a chronic helminth infection: The puzzling case of Mansonella ozzardi
Source: PubMed Central journal article supplement (PMC5854421; doi:10.1371/journal.pntd.0006327), 2018-03-05
Supplement: pntd.0006327.s010.pdf [file pntd.0006327.s010.pdf]

**S3 Table. Panel 3: Monoclonal antibodies used to characterize Ki67-expressing Treg cells.**

| Specificity | Fluorochrome | Volume per test ( $\mu$ L) | Manufacturer |
|-------------|--------------|----------------------------|--------------|
| FOXP3       | Percpcy5.5   | 5                          | eBioscience  |
| CD39        | BV421        | 0.5                        | Biolegend    |
| CD4         | PE           | 1                          | Biolegend    |
| CD3         | Pecy7        | 1                          | Biolegend    |
| CD127       | APCcy7       | 1                          | eBioscience  |
| CD25        | FITC         | 0.5                        | Biolegend    |
| Ki67        | APC          | 2                          | BD           |
| Viability   | Acqua        | 0.67                       | Invitrogen   |
