# Supplementary material for: CD39 and immune regulation in a chronic helminth infection: The puzzling case of Mansonella ozzardi
Source: PubMed Central journal article supplement (PMC5854421; doi:10.1371/journal.pntd.0006327), 2018-03-05
Supplement: pntd.0006327.s011.pdf [file pntd.0006327.s011.pdf]

**S4 Table. Panel 4: Monoclonal antibodies used for intracellular cytokine staining in CD4<sup>+</sup> T cells.**

| Specificity   | Fluorochrome | Volume per test ( $\mu$ L) | Manufacturer |
|---------------|--------------|----------------------------|--------------|
| CD3           | APCCy7       | 0.5                        | Biolegend    |
| CD4           | PerCPcy5.5   | 0.5                        | Biolegend    |
| IL-2          | FITC         | 0.25                       | Biolegend    |
| IL-4          | PE           | 0.5                        | EBiociences  |
| IL-5          | PE           | 0.5                        | BD           |
| IL-10         | APC          | 1                          | Biolegend    |
| IL-13         | PE           | 1                          | BD           |
| IFN- $\gamma$ | BV421        | 0.5                        | Biolegend    |
| Viability     | Acqua        | 0.67                       | Invitrogen   |
| TNF- $\alpha$ | Pecy7        | 0.25                       | Biolegend    |
