# Supplementary material for: CD39 and immune regulation in a chronic helminth infection: The puzzling case of Mansonella ozzardi
Source: PubMed Central journal article supplement (PMC5854421; doi:10.1371/journal.pntd.0006327), 2018-03-05
Supplement: pntd.0006327.s012.pdf [file pntd.0006327.s012.pdf]

**S5 Table. Frequency of clinical signs and symptoms reported by *M. ozzardi*-infected subjects and uninfected controls.**

| Symptoms                | % (number) per group |          | <i>P</i> value |
|-------------------------|----------------------|----------|----------------|
|                         | fil-                 | fil+     |                |
| No. of subjects         | 34                   | 50       |                |
| Presence of any symptom | 50 (17)              | 54 (27)  | 0.445          |
| Fever                   | 5.9 (2)              | 2.0 (1)  | 0.161          |
| Headache                | 20.6 (7)             | 14.0 (7) | 0.307          |
| Myalgia                 | 11.8 (4)             | 16.0 (8) | 0.416          |
| Arthralgia              | 20.6 (7)             | 14.0 (7) | 0.307          |
| Dizziness               | 2.9 (1)              | 6.0 (3)  | 0.465          |
| Weakness                | 2.9 (1)              | 6.0 (3)  | 0.465          |
| Abdominal pain          | 2.9 (1)              | 16.0 (8) | 0.056          |
| Vomiting                | 0.0 (0)              | 2.0 (1)  | 0.595          |

Proportions were compared with the  $\chi^2$  test.
