# Supplementary material for: CD39 and immune regulation in a chronic helminth infection: The puzzling case of Mansonella ozzardi
Source: PubMed Central journal article supplement (PMC5854421; doi:10.1371/journal.pntd.0006327), 2018-03-05
Supplement: pntd.0006327.s013.pdf [file pntd.0006327.s013.pdf]

**S6 Table. Demographic, hematologic, and clinical characteristics of study participants according to levels of BmA-specific IgG<sub>4</sub> antibodies.** Subjects with BmA antibody levels above the overall median were defined as IgG4H, while those with BmA antibody levels below the overall median were defined as IgG4L.

| Characteristic                                             | Value for group  |                   | P value |
|------------------------------------------------------------|------------------|-------------------|---------|
|                                                            | IgG4L            | IgG4H             |         |
| No. of subjects                                            | 56               | 26                |         |
| Age in years (range)                                       | 37 (7-89)        | 44.(12-98)        | 0.199   |
| Gender (% male)                                            | 46.4             | 69.2              | 0.284   |
| Village                                                    |                  |                   |         |
| Boa Vista                                                  | 8                | 0                 |         |
| Monte Verde                                                | 11               | 5                 |         |
| Nova Vida                                                  | 15               | 5                 |         |
| Retiro                                                     | 11               | 6                 | 0.014   |
| São Pedro                                                  | 2                | 2                 |         |
| Valparaíso                                                 | 7                | 8                 |         |
| Hemoglobin levels (g/100 mL)                               | 14.1 (11.8-21.2) | 14.9 (11.7-17.40) | 0.059   |
| Anemia (%)                                                 | 2.9 (n = 1)      | 6.0 (n = 3)       | 0.410   |
| No. of WBCs (10 <sup>9</sup> /L)                           | 8.1 (3.9-17)     | 7.9 (3.9-15.4)    | 0.668   |
| No. of lymphocytes (10 <sup>9</sup> /L)                    | 2.6 (1.3-5.6)    | 2.0 (1.2-3.8)     | 0.009   |
| No. of granulocytes (10 <sup>9</sup> /L)                   | 4.6 (1.9-13.7)   | 5.0 (1.9-43)      | 0.069   |
| No. of T lymphocytes (10 <sup>9</sup> /L)                  | 1.74 (0.90-3.58) | 1.42 (0.66-2.75)  | 0.009   |
| No. of CD4 <sup>+</sup> T lymphocytes (10 <sup>9</sup> /L) | 1.05 (0.43-2.13) | 0.80 (0.43-1.70)  | 0.008   |

Data are presented as median (interquartile range) except if otherwise indicated and were compared with the Mann-Whitney test (continuous variables) or with the  $\chi^2$  test (proportions).
