# Supplementary material for: CD39 and immune regulation in a chronic helminth infection: The puzzling case of Mansonella ozzardi
Source: PubMed Central journal article supplement (PMC5854421; doi:10.1371/journal.pntd.0006327), 2018-03-05
Supplement: pntd.0006327.s014.pdf [file pntd.0006327.s014.pdf]

**S7 Table.** Levels of plasma cytokines in microfilaremic subjects (Fil+) and uninfected controls (Fil-).

| Cytokine        | Value for group (pg/mL) |                        | P value |
|-----------------|-------------------------|------------------------|---------|
|                 | Fil-                    | Fil+                   |         |
| No. of subjects | 34                      | 49                     |         |
| IL-1ra          | 53.30 (21.60-588.87)    | 46.17 (0-166.41)       | 0.212   |
| TNF- $\alpha$   | 18.34 (0-36.42)         | 9.73 (0-56.09)         | 0.012*  |
| IL-2            | Not detected            | Not detected           | NA      |
| IL-7            | 29.05 (0-68.09)         | 17.78 (0-84.98)        | 0.029   |
| IP10            | 26.00 (6.56-89.23)      | 22.27 (11.86-130.06)   | 0.869   |
| IL-2r           | 206.44 (78.54-469.40)   | 236.01 (0-510.32)      | 0.157   |
| MIG             | 215.20 (17.06-2355.04)  | 137.28 (26.83-2375.68) | 0.435   |
| IL-4            | 9.25 (0.00-14.23)       | 0.00 (0.00-88.11)      | 0.008*  |
| IL-8            | 28.53 (0.00-43.24)      | 4.68 (0.00-268.24)     | 0.005*  |
| FGF             | 2.70 (0.00-190.69)      | 6.11 (0.00-11.01)      | 0.465   |
| IL-1 $\beta$    | 0.45 (0.00-21.89)       | 0.44 (0.00-13.33)      | 0.720   |
| G-CSF           | 101.86 (0.00-302.16)    | 52.36 (0.00-487.96)    | 0.016*  |
| IL-10           | 13.69 (0.00-653.05)     | 17.45 (0.00-67.01)     | 0.052   |
| IL-13           | 29.08 (0.00-182.97)     | 10.80 (0.00-161.32)    | 0.098   |
| IL-6            | 7.99 (0.00-48.90)       | 3.85 (0.00-34.69)      | 0.021*  |
| IL-12 (p40/p70) | 126.98 (47.56-270.87)   | 118.08 (60.32-359.40)  | 0.566   |
| CCL5/RANTES     | 230.63 (0.00-1268.45)   | 303.80 (0.00-1293.65)  | 0.501   |
| Eotaxin         | 37.00 (13.10-93.89)     | 47.72 (18.21-66.05)    | 0.006*  |
| IL-17           | 2.25 (0-4.45)           | 0.00 (0.00-35.06)      | 0.064   |
| MIP-1 $\alpha$  | 28.92 (0.00-108.29)     | 16.05 (0.00-84.77)     | 0.016*  |
| GM-CSF          | Not detected            | Not detected           | NA      |
| MIP-1 $\beta$   | 54.36 (0.00-128.88)     | 31.83 (0.00-84.77)     | 0.034   |
| MCP-1           | 121.61 (48.38-561.06)   | 144.24(57.52-223.26)   | 0.198   |
| IL-15           | 31.51 (0.00-556.68)     | 22.23 (0.0-199.02)     | 0.034   |
| EGF             | 4.64 (0.00-66.99)       | 3.34 (0.00-23.52)      | 0.150   |
| IL-5            | 7.90 (0.00-48.92)       | 5.40 (0.00-30.49)      | 0.176   |
| HGF             | 61.81 (21.60-158.82)    | 52.54 (24.56-136.63)   | 0.110   |
| VEGF            | 0.93 (0.00-11.85)       | 0.57 (0.00-13.96)      | 0.836   |
| IFN- $\gamma$   | 8.30 (0.00-46.40)       | 3.99 (0.00-42.37)      | 0.117   |
| IFN- $\alpha$   | 37.64 (0.00-434.04)     | 38.44 (0.00-89.40)     | 0.356   |

Data are presented as medians (interquartile ranges) and were compared with the Mann-Whitney *U* test. \* indicates a significant result after controlling for a false discovery rate (*q*) set at 0.10 (*m* = 28). NA = not applicable.
