# Supplementary material for: CD39 and immune regulation in a chronic helminth infection: The puzzling case of Mansonella ozzardi
Source: PubMed Central journal article supplement (PMC5854421; doi:10.1371/journal.pntd.0006327), 2018-03-05
Supplement: pntd.0006327.s015.pdf [file pntd.0006327.s015.pdf]

**S8 Table. Proportion of CD4<sup>+</sup> T cells from microfilaremic subjects (Fil+) and uninfected controls (Fil-) producing specific cytokines upon stimulation *in vitro* with filarial (BmA) and unrelated (SEB) antigen.**

| Cytokine      | Value for group (% of CD4 <sup>+</sup> cells) |                  |                     |                     |
|---------------|-----------------------------------------------|------------------|---------------------|---------------------|
|               | BmA                                           |                  | SEB                 |                     |
|               | Fil-                                          | Fil+             | Fil-                | Fil+                |
| No. subjects  | 28                                            | 40               | 28                  | 40                  |
| IFN- $\gamma$ | 0.15 (0.09-0.32)                              | 0.18 (0.09-0.40) | 6.83 (4.72-8.86)    | 7.4 (4.93-10.22)    |
| IL-2          | 0.35 (0.23-0.57)                              | 0.34 (0.19-0.51) | 16.35 (13.37-19.82) | 15.95 (11.77-20.25) |
| IL-10         | 0.78 (0.27-1.51)                              | 1.08 (0.50-1.94) | 0.94 (0.70-1.40)    | 1.00 (0.73-1.73)    |
| Th2           | 0.21 (0.11-0.41)                              | 0.17 (0.13-0.22) | 3.06 (2.31-3.91)    | 3.45 (2.52-4.41)    |
| TNF- $\alpha$ | 0.21 (0.13-0.30)                              | 0.18 (0.14-0.32) | 9.27 (6.02-10.52)   | 9.26 (7.36-12.30)   |

Data are presented as medians (interquartile ranges) and were compared with the Mann-Whitney  $U$  test. No significant difference was found between cells from Fil+ and Fil- subjects stimulated with the same antigen after controlling for a false discovery rate ( $q$ ) = 0.10,  $m$  = 5. Th2 = IL-4, IL-5, and IL-13
