# Supplementary material for: CD39 and immune regulation in a chronic helminth infection: The puzzling case of Mansonella ozzardi
Source: PubMed Central journal article supplement (PMC5854421; doi:10.1371/journal.pntd.0006327), 2018-03-05
Supplement: pntd.0006327.s016.pdf [file pntd.0006327.s016.pdf]

**S9 Table. Levels of cytokines in PBMC culture supernatants from microfilaremic subjects (Fil+) and uninfected controls (Fil-) after stimulation *in vitro* with filarial (BmA) and unrelated (SEB) antigen.**

|                                | Citokine concentration for group (pg/mL) |                          |                           |                            |
|--------------------------------|------------------------------------------|--------------------------|---------------------------|----------------------------|
|                                | BmA                                      |                          | SEB                       |                            |
|                                | Fil-                                     | Fil+                     | Fil-                      | Fil+                       |
| No. subjects                   | 15                                       | 27                       | 15                        | 27                         |
| <b>IL-6</b>                    | 876.24 (450.68-2345.21)                  | 1329.37 (657.10-3751.14) | 4299.47 (1435.60-6386.87) | 6539.97 (2239.49-10376.40) |
| <b>IL-13</b>                   | 311.01 (132.51-469.32)                   | 387.30 (65.15-1677.16)   | 2110.80 (877.52-2846.52)  | 2382.2 (843.21-3126.13)    |
| <b>IL-10</b>                   | 132.38 (27.00-350.84)                    | 174.37 (67.09-611.78)    | 556.92 (143.00-759.48)    | 1176.39 (147.33-1301.28)   |
| <b>IL-4</b>                    | 3.26 (1.23-29.69)                        | 2.73 (1.15-30.82)        | 59.48 (11.00-177.32)      | 122.23 (35.00-238.90)      |
| <b>IFN-<math>\gamma</math></b> | 213.90 (88.65-181.74)                    | 184.34 (76.65-165.43)    | 827.37 (234.93-1134.28)   | 926.26 (364.18-1478.63)    |

Data are presented as medians (interquartile ranges) and were compared with the Mann-Whitney  $U$  test. No significant difference was found between levels of cytokines released by cells from Fil+ and Fil- subjects stimulated with the same antigen after controlling for a false discovery rate ( $q$ ) = 0.10,  $m$  = 5.
