# Supplementary material for: CD39 and immune regulation in a chronic helminth infection: The puzzling case of Mansonella ozzardi
Source: PubMed Central journal article supplement (PMC5854421; doi:10.1371/journal.pntd.0006327), 2018-03-05
Supplement: pntd.0006327.s017.pdf [file pntd.0006327.s017.pdf]

**S10 Table. Frequency (%) of T CD4<sup>+</sup> lymphocytes expressing regulation and activation markers in study participants divided into IgG4L and IgG4H groups according to their levels of BmA-specific IgG<sub>4</sub> antibodies.**

| Marker               | Value for group (% of CD4 <sup>+</sup> T cells) |                     | P value |
|----------------------|-------------------------------------------------|---------------------|---------|
|                      | IgG4L                                           | IgG4H               |         |
| No. subjects         | 52                                              | 24                  |         |
| CD39                 | 5.86 (2.59-7.70)                                | 7.56 (6.09-11.40)   | 0.005*  |
| CTLA-4               | 0.59 (0.04-9.84)                                | 0.41 (0.06-7.15)    | 0.275   |
| Intracellular CTLA-4 | 21.40(16.23-42.81)                              | 20.65 (12.80-27.10) | 0.621   |
| HLADR                | 4.44 (1.78-12.60)                               | 5.06 (3.10-11.30)   | 0.229   |
| PD1                  | 9.34 (3.18-12.50)                               | 8.39 (2.67-11.80)   | 0.356   |
| TNFR11               | 5.73 (1.45-16.50)                               | 6.54 (2.03-15.60)   | 0.240   |
| GITR                 | 0.37 (0.11-2.00)                                | 0.62 (0.13-2.11)    | 0.015   |
| LAG3                 | 0.08 (0.02-0.47)                                | 0.10 (0.02-0.78)    | 0.954   |
| LAP                  | 4.04 (1.54-13.20)                               | 4.36 (2.35-12.40)   | 0.463   |
| OX40                 | 8.50 (3.68-16.80)                               | 7.72 (2.78-22.10)   | 0.653   |
| CD69                 | 4.62 (1.60-18.50)                               | 7.32 (2.15-18.70)   | 0.362   |

Data are presented as medians (interquartile ranges) and were compared with the Mann-Whitney *U* test . \* indicates a significant result after controlling for a false discovery rate (*q*) set at 0.10 (*m* = 11).
