# Supplementary material for: CD39 and immune regulation in a chronic helminth infection: The puzzling case of Mansonella ozzardi
Source: PubMed Central journal article supplement (PMC5854421; doi:10.1371/journal.pntd.0006327), 2018-03-05
Supplement: pntd.0006327.s018.pdf [file pntd.0006327.s018.pdf]

**S11 Table. Frequency (%) of CD4<sup>+</sup>CD25<sup>hi</sup>CD127<sup>-</sup>FoxP3<sup>+</sup> (Treg) cells expressing regulatory and activation markers in study participants divided into IgG4L and IgG4H groups according to their levels of BmA-specific IgG<sub>4</sub> antibodies.**

| Marker                                              | Value for group (% of Treg cells) |                     | P value |
|-----------------------------------------------------|-----------------------------------|---------------------|---------|
|                                                     | IgG4L                             | IgG4H               |         |
| No. of subjects                                     | 52                                | 24                  |         |
| CD69 <sup>+</sup>                                   | 3.17 (1.18-6.50)                  | 3.32 (0.89-7.90)    | 0.350   |
| CTLA-4 <sup>+</sup>                                 | 0.40 (0.01-2.30)                  | 0.94 (0.02-3.18)    | 0.542   |
| CTLA-4 <sup>+</sup> intracellular                   | 80.20 (68.90-90.30)               | 77.10 (65.90-87.60) | 0.244   |
| HLADR <sup>+</sup>                                  | 30.60 (18.20-35.20)               | 26.65 (12.31-45.30) | 0.117   |
| PD1 <sup>+</sup>                                    | 4.46 (1.53-8.80)                  | 4.22 (1.90-7.30)    | 0.950   |
| TNFR11 <sup>+</sup>                                 | 45.40 (28.76-56.90)               | 42.25 (27.50-61.30) | 0.972   |
| GITR <sup>+</sup>                                   | 0.65 (0.01-0.79)                  | 0.33 (0.01-0.59)    | 0.058   |
| LAG3 <sup>+</sup>                                   | 0.15 (0.00-0.32)                  | 0.14 (0.00-0.26)    | 0.718   |
| LAP <sup>+</sup>                                    | 7.17 (3.91-14.70)                 | 6.10 (2.35-12.00)   | 0.470   |
| OX40 <sup>+</sup>                                   | 3.48 (1.63-6.33)                  | 3.84 (1.86-5.54)    | 0.784   |
| CD39 <sup>+</sup>                                   | 59.90 (48.05-64.40)               | 68.2 (58.3-70.16)   | 0.022   |
| CD39 <sup>+</sup> CD69 <sup>+</sup>                 | 3.09 (1.44-8.90)                  | 3.42 (0.80-9.50)    | 0.395   |
| CD39 <sup>+</sup> CTLA-4 <sup>+</sup>               | 0.40 (0.01-1.31)                  | 1.06 (0.10-1.52)    | 0.939   |
| CD39 <sup>+</sup> intracellular CTLA-4 <sup>+</sup> | 84.00 (68.90-88.20)               | 83.90 (71.35-86.60) | 0.766   |
| CD39 <sup>+</sup> HLADR <sup>+</sup>                | 35.10 (21.30-49.80)               | 32.45 (23.70-54.30) | 0.595   |
| CD39 <sup>+</sup> PD1 <sup>+</sup>                  | 3.50 (0.70-8.10)                  | 3.76 (0.94-8.70)    | 0.603   |
| CD39 <sup>+</sup> TNFR11 <sup>+</sup>               | 46.10 (22.10-53.80)               | 45.75 (21.62-50.10) | 0.814   |
| CD39 <sup>+</sup> GITR <sup>+</sup>                 | 0.49 (0.01-0.98)                  | 0.36 (0.00-0.52)    | 0.275   |
| CD39 <sup>+</sup> LAG3 <sup>+</sup>                 | 0.13 (0.00-0.25)                  | 0.13 (0.00-0.22)    | 0.757   |
| CD39 <sup>+</sup> LAP <sup>+</sup>                  | 6.82 (1.18-13.10)                 | 6.16 (2.10-12.40)   | 0.879   |
| CD39 <sup>+</sup> OX40 <sup>+</sup>                 | 4.17 (1.71-6.82)                  | 4.55 (2.01-6.76)    | 0.780   |
| CD39 <sup>-</sup> CD69 <sup>+</sup>                 | 4.22 (1.53-11.30)                 | 2.86 (0.45-9.40)    | 0.347   |
| CD39 <sup>-</sup> CTLA4 <sup>+</sup>                | 0.48 (0.00-2.86)                  | 1.10 (0.12-1.99)    | 0.461   |
| CD39 <sup>-</sup> intracellular CTLA-4 <sup>+</sup> | 65.05 (39.40-77.60)               | 64.20 (37.87-75.60) | 0.355   |

|                                       |                     |                     |       |
|---------------------------------------|---------------------|---------------------|-------|
| CD39 <sup>-</sup> HLADR <sup>+</sup>  | 16.30 (9.40-25.20)  | 11.30 (9.80-14.43)  | 0.127 |
| CD39 <sup>-</sup> PD1 <sup>+</sup>    | 7.83 (5.32-11.70)   | 5.70 (3.10-10.40)   | 0.141 |
| CD39 <sup>-</sup> TNFR11 <sup>+</sup> | 35.85 (18.80-29.45) | 30.30 (13.45-34.90) | 0.076 |
| CD39 <sup>-</sup> GITR <sup>+</sup>   | 0.04 (0.00-0.51)    | 0.04 (0.00-1.56)    | 0.083 |
| CD39 <sup>-</sup> LAG3 <sup>+</sup>   | 0.00 (0.00-0.60)    | 0.00 (0.00-0.98)    | 0.380 |
| CD39 <sup>-</sup> LAP <sup>+</sup>    | 5.87 (2.24-13.50)   | 5.26 (1.76-10.50)   | 0.708 |
| CD39 <sup>-</sup> OX40 <sup>+</sup>   | 2.54 (0.78-8.20)    | 2.93 (1.21-9.10)    | 0.582 |

---

Data are presented as medians (interquartile ranges) and were compared with the Mann-Whitney *U* test. No difference remained statistically significant after controlling for a false discovery rate ( $q$ ) = 0.10,  $m$  = 31.
